# Supplementary material
Source: Royal Society of Chemistry journal article supplement (doi:10.1039/d5fo05170c)
Supplement: d5fo05170c1.xlsx [file d5fo05170c1.xlsx]

## Sheet: Figure_2
Figure_1 A				Figure_1_B_C				Topological analysis															Figure_1_D
CKD targets (19585)	CTP targets (188)	183 Common Targets (CTP and CKD)		PPI analysis				MCC				Degree				Closness				Hub	Repetition		13 Hub targets
TRNF	CA7	CA7		#Node	Identifier	Node_degree		Rank	Name	Score		Rank	Name	Score		Rank	Name	Score		MAPK14	6		MAPK14
C2CD4A	CA1	CA1		EGFR	9606.ENSP00000275493	66		1	HIF1A	1765977313		1	EGFR	66		1	EGFR	116.5		NFE2L2	6		NFE2L2
PDE1B	CA12	CA12		HSP90AA1	9606.ENSP00000335153	63		2	HSP90AA1	1758224126		2	HSP90AA1	63		2	SRC	115.5		NFKB1	6		NFKB1
FRMD1	CA9	CA9		HIF1A	9606.ENSP00000437955	61		3	EGFR	1742085754		3	SRC	61		3	HSP90AA1	114.5		PARP1	6		PARP1
NDUFB2	CA13	CA13		SRC	9606.ENSP00000362680	61		4	SRC	1732839632		3	HIF1A	61		4	HIF1A	112.75		GSK3B	6		GSK3B
NDUFB5	CA14	CA14		NFKB1	9606.ENSP00000226574	51		5	STAT1	1724942802		5	NFKB1	51		5	NFKB1	107.917		EGFR	6		EGFR
NDUFC1	CA6	CA6		ERBB2	9606.ENSP00000269571	48		6	NFKB1	1723981966		6	HSP90AB1	48		6	HSP90AB1	106.333		ERBB2	6		ERBB2
NDUFB1	CA4	CA4		HSP90AB1	9606.ENSP00000360609	48		7	PARP1	1721229872		6	ERBB2	48		7	ERBB2	105.917		HIF1A	6		HIF1A
NDUFA4L2	CA5A	CA5A		GSK3B	9606.ENSP00000324806	46		8	ERBB2	1709474996		8	GSK3B	46		8	GSK3B	104.917		HSP90AA1	6		HSP90AA1
MFSD14B	CA5B	CA5B		MAPK14	9606.ENSP00000229795	36		9	HSP90AB1	1676578338		9	PARP1	36		9	STAT1	97.6667		HSP90AB1	6		HSP90AB1
PPDPFL	CA2	CA2		PARP1	9606.ENSP00000355759	36		10	IGF1R	1658260080		9	MAPK14	36		10	MAPK14	97.5833		IGF1R	6		IGF1R
PCNX2	MAOA	MAOA		STAT1	9606.ENSP00000354394	34		11	GSK3B	1608419342		11	STAT1	34		11	PARP1	97.3333		SRC	6		SRC
LINC03051	ALOX5	ALOX5		IGF1R	9606.ENSP00000497069	31		12	NFE2L2	1561162246		12	IGF1R	31		12	IGF1R	95.75		STAT1	6		STAT1
ZC3H12C	CBR1	CBR1		CHEK1	9606.ENSP00000391090	30		13	MAPK14	613107584		13	CHEK1	30		13	NFE2L2	94.5		JAK2	5
TJAP1	EGFR	EGFR		NFE2L2	9606.ENSP00000380252	30		14	AR	578113947		13	NFE2L2	30		14	JAK2	94.3333		AR	2
ZNF254	CA3	CA3		CDK2	9606.ENSP00000266970	29		15	JAK2	557058619		15	JAK2	29		15	MAPK8	93		CDK2	2
LYPD6	AKR1C1	AKR1C1		JAK2	9606.ENSP00000371067	29														CHEK1	2
APOL5	NQO2	NQO2		AURKA	9606.ENSP00000216911	28		Radility				MNC				EPC				MAPK8	1
PP2D1	XDH	XDH		CDK1	9606.ENSP00000378699	28		Rank	Name	Score		Rank	Name	Score		Rank	Name	Score
TMEM154	PARP1	PARP1		MAPK8	9606.ENSP00000378974	28		1	SRC	5.10002		1	EGFR	66		1	EGFR	20.907
OR52N2	SRD5A1	SRD5A1		PTPRC	9606.ENSP00000411355	27		2	EGFR	5.07803		2	HSP90AA1	63		2	HSP90AA1	20.31
SETD9	MAOB	MAOB		CCNA2	9606.ENSP00000481380	26		3	HSP90AA1	5.04506		3	HIF1A	60		3	HIF1A	19.929
EFHB	TGM2	TGM2		AR	9606.ENSP00000363822	25		4	HIF1A	5.00659		4	SRC	59		4	SRC	19.67
ADGRA3	SRC	SRC		ITGB1	9606.ENSP00000379350	25		5	NFKB1	4.95713		5	NFKB1	51		5	ERBB2	19.299
OR52D1	ADAMTS5	ADAMTS5		PTPN11	9606.ENSP00000489597	25		6	HSP90AB1	4.94064		6	HSP90AB1	48		6	HSP90AB1	18.753
MOB3A	GSK3B	GSK3B		SERPINE1	9606.ENSP00000223095	24		7	ERBB2	4.92415		6	ERBB2	48		7	NFKB1	18.455
GALNT7	QTRT1	QTRT1		TOP2A	9606.ENSP00000411532	24		8	GSK3B	4.91316		8	GSK3B	44		8	GSK3B	17.27
RNF133	TYMP	TYMP		PDGFRB	9606.ENSP00000261799	23		9	STAT1	4.80325		9	PARP1	36		9	PARP1	16.931
C19orf84	MGLL	MGLL		CCNA1	9606.ENSP00000255465	22		10	MAPK14	4.78126		9	MAPK14	36		10	IGF1R	16.675
MIER3	MAPK8	MAPK8		JAK1	9606.ENSP00000499900	22		11	IGF1R	4.77577		11	STAT1	34		11	STAT1	16.341
OR52E1	MAPK9	MAPK9		RPS6KB1	9606.ENSP00000225577	22		12	PARP1	4.77027		12	IGF1R	31		12	MAPK14	15.874
PRSS27	GRM5	GRM5		SYK	9606.ENSP00000364898	22		13	JAK2	4.74829		13	CHEK1	30		13	JAK2	15.566
GGTLC4P	JAK2	JAK2		PDGFRA	9606.ENSP00000257290	21		14	NFE2L2	4.74279		13	NFE2L2	30		14	NFE2L2	15.396
GGTLC5P	KCNN1	KCNN1		TYK2	9606.ENSP00000431885	21		15	AR	4.72081		15	CDK2	29		15	CDK2	14.629
BTF3P11	KCNN3	KCNN3		ESR2	9606.ENSP00000343925	20
BFAR	KCNN2	KCNN2		SLC2A1	9606.ENSP00000416293	20
CCDC3	CDC7	CDC7		AXL	9606.ENSP00000301178	19
ZGLP1	ALDH1A1	ALDH1A1		FLT1	9606.ENSP00000282397	19
TUBB8	PDE4A	PDE4A		KEAP1	9606.ENSP00000377245	19
RAB3C	TYK2	TYK2		CYP3A4	9606.ENSP00000498939	18
ATAD2B	KDM4C	KDM4C		FGFR1	9606.ENSP00000393312	18
TRBV20OR9-2	ESR2	ESR2		ALK	9606.ENSP00000373700	17
ZBTB7B	PDE5A	PDE5A		BTK	9606.ENSP00000483570	17
SLC67A1	MAPK14	MAPK14		NOS2	9606.ENSP00000327251	17
NSG1	PIM2	PIM2		PLAU	9606.ENSP00000361850	17
H3P16	MAP3K14	MAP3K14		CDC25C	9606.ENSP00000321656	16
C16orf82	NOTUM	GABRA5		CHUK	9606.ENSP00000359424	16
BCCIP	GABRA5	IGF1R		MAP2K2	9606.ENSP00000262948	16
GUCY1B2	IGF1R	CHEK1		MPO	9606.ENSP00000225275	16
UBXN2A	CHEK1	ACHE		LGALS3	9606.ENSP00000254301	15
GUCY1A2	ACHE	AKR1B1		ALDH1A1	9606.ENSP00000297785	14
SUGP1	AKR1B1	TAAR1		KDM1A	9606.ENSP00000383042	14
SMOC2	TAAR1	GPR35		CDC7	9606.ENSP00000393139	13
PLEKHH2	GPR35	PLK4		KIF11	9606.ENSP00000260731	13
NMRK1	PLK4	SQLE		MAPK9	9606.ENSP00000394560	13
ALLC	SQLE	ERBB2		PBK	9606.ENSP00000428489	13
SCAF11	ERBB2	JAK1		PLK4	9606.ENSP00000270861	13
SRMS	JAK1	PDE4D		PSMB1	9606.ENSP00000262193	13
KTN1	PDE4D	GRM4		PSMB2	9606.ENSP00000362334	13
ANKRD36	GRM4	CSNK1A1		XDH	9606.ENSP00000368727	13
ZBTB34	CSNK1A1	CSNK1D		CFTR	9606.ENSP00000003084	12
ATP6V1C1	CSNK1D	PTPRC		DHFR	9606.ENSP00000396308	12
H3P10	PTPRC	HIPK2		GRM5	9606.ENSP00000306138	12
MTCO2P12	HIPK2	CES1		MAOB	9606.ENSP00000367309	12
C2CD4B	CES1	MAPK10		ZAP70	9606.ENSP00000264972	12
PRSS55	MAPK10	CES2		AKR1B1	9606.ENSP00000285930	11
ATP5MK	CES2	AURKA		ANPEP	9606.ENSP00000300060	11
RNF148	AURKA	DHFR		APEX1	9606.ENSP00000216714	11
CCDC92	DHFR	MAP2K3		CA9	9606.ENSP00000367608	11
TCEA2	MAP2K3	SYK		CDC25B	9606.ENSP00000245960	11
ARHGAP28	SYK	CHUK		CTSD	9606.ENSP00000236671	11
THYN1	CHUK	RPS6KA5		MAOA	9606.ENSP00000340684	11
STIMATE	RPS6KA5	RPS6KB1		MDM4	9606.ENSP00000356150	11
TRBV7-9	RPS6KB1	PBK		NOX1	9606.ENSP00000362057	11
RABGAP1	PBK	PRKD2		CA1	9606.ENSP00000430656	10
PPIP5K2	PRKD2	BTK		HDAC9	9606.ENSP00000408617	10
PODN	BTK	PIM3		NR4A1	9606.ENSP00000440864	10
KRT90P	PIM3	MAP4K4		TTR	9606.ENSP00000237014	10
TRAV29DV5	PRKX	MPO		CA4	9606.ENSP00000300900	9
TRGV3	MAP4K4	CTSL		CSNK2B	9606.ENSP00000365042	9
C1QL1	MPO	TRPA1		DRD1	9606.ENSP00000377353	9
AIFM2	CTSL	PDE7A		GABRA1	9606.ENSP00000393097	9
DNLZ	TRPA1	FGFR1		MAP2K3	9606.ENSP00000345083	9
PHTF1	PDE7A	CDK2		NR1I2	9606.ENSP00000336528	9
INPP4B	FGFR1	CCNA1		PDE4D	9606.ENSP00000345502	9
ENSG00000288534	CDK2	CCNA2		TRIM24	9606.ENSP00000340507	9
SLC37A2	CCNA1	APEX1		ACHE	9606.ENSP00000303211	8
LINC00342	CCNA2	PDE3A		CA12	9606.ENSP00000178638	8
DPF1	APEX1	PDE3B		CA2	9606.ENSP00000285379	8
GPR166P	PDE3A	NAAA		CBR1	9606.ENSP00000290349	8
INHBE	PDE3B	NTRK3		CSNK1A1	9606.ENSP00000261798	8
THBS3	NAAA	TRIM24		GRIA2	9606.ENSP00000296526	8
PRAL	CLK4	ALOX12		HTR2C	9606.ENSP00000276198	8
SHC2	NTRK3	KCNA5		MMP12	9606.ENSP00000458585	8
CLEC4F	TRIM24	CTSD		ADAM10	9606.ENSP00000260408	7
CSAG4	DUSP3	ANPEP		CTSL	9606.ENSP00000345344	7
SH3YL1	ALOX12	SLC2A1		ENPP1	9606.ENSP00000498074	7
CSE1L-DT	KCNA5	NFE2L2		MAP3K14	9606.ENSP00000482657	7
SLC5A8	CTSD	TOP2A		MGLL	9606.ENSP00000265052	7
GGTLC1	ANPEP	HDAC8		PDE11A	9606.ENSP00000286063	7
HHLA1	SLC2A1	C5AR1		PDE4A	9606.ENSP00000370078	7
TM7SF2	NFE2L2	PSMB1		PDE5A	9606.ENSP00000347046	7
GDF10	TOP2A	KLF5		AKR1C1	9606.ENSP00000370254	6
NME2P1	HDAC8	NR1I2		C5AR1	9606.ENSP00000347197	6
JAML	C5AR1	CSNK2B		CBX4	9606.ENSP00000269397	6
TBC1D9	PSMB1	HTR2C		CSNK1D	9606.ENSP00000381531	6
ENSG00000275993	KLF5	HIF1A		GABRA5	9606.ENSP00000382953	6
H3P23	NR1I2	THRA		GRM4	9606.ENSP00000440556	6
DCTN6	CSNK2B	GGPS1		KLF5	9606.ENSP00000366915	6
ZNRD2	HTR2C	CACNA1B		NPC1	9606.ENSP00000269228	6
HSP90B2P	HIF1A	SLC6A5		PDE3A	9606.ENSP00000351957	6
AOC2	THRA	GPBAR1		PDE3B	9606.ENSP00000282096	6
TAS2R62P	GGPS1	PRCP		SLC1A3	9606.ENSP00000265113	6
ENSG00000284779	CACNA1B	ENPP1		TAAR1	9606.ENSP00000275216	6
TBPL2	SLC6A5	GLRA1		ALOX12	9606.ENSP00000251535	5
GOLGA6A	GPBAR1	ALK		ALOX5	9606.ENSP00000363512	5
TSKU	PRCP	GLS		CA3	9606.ENSP00000285381	5
GBP3	ENPP1	NFKB1		CA6	9606.ENSP00000366654	5
PCBP4	GLRA1	TDP1		CA7	9606.ENSP00000345659	5
CMAS	ALK	GPR6		CACNA1B	9606.ENSP00000360423	5
SAMD4A	GLS	AR		CES1	9606.ENSP00000353720	5
IGKV1-16	NFKB1	PTPN11		GPBAR1	9606.ENSP00000430886	5
TMEM132A	TDP1	PDE11A		GPR55	9606.ENSP00000498258	5
DEFA1B	GPR6	RORB		HIPK2	9606.ENSP00000385571	5
GBP6	AR	CDK1		KCNA5	9606.ENSP00000252321	5
ERMP1	PTPN11	LGALS3		MIF	9606.ENSP00000215754	5
ZBTB7C	PDE11A	F13A1		NTRK3	9606.ENSP00000354207	5
MRO	RORB	NPC1		PDE7A	9606.ENSP00000385632	5
NUDT19	CDK1	ITGB1		SCD	9606.ENSP00000359380	5
SPX	LGALS3	CDC25C		SQLE	9606.ENSP00000265896	5
NKD1	F13A1	METAP2		TFPI	9606.ENSP00000233156	5
LINC00265	NPC1	GRIA2		THRA	9606.ENSP00000264637	5
PPIP5K1	ITGB1	TFPI		TYRO3	9606.ENSP00000263798	5
CMTR2	CDC25C	NOS2		ACVRL1	9606.ENSP00000373574	4
ALS2CL	METAP2	GPR55		CA13	9606.ENSP00000318912	4
KIFC2	GRIA2	MMP12		HDAC8	9606.ENSP00000362674	4
ARID4B	TFPI	CFTR		KCNN3	9606.ENSP00000481848	4
FAM151A	NOS2	KIF11		MAP4K4	9606.ENSP00000343658	4
MDP1	GPR55	SLC1A3		TDP1	9606.ENSP00000337353	4
TMEM14A	MMP12	TTR		TNIK	9606.ENSP00000399511	4
ENSG00000293615	CFTR	CDC25B		TRPA1	9606.ENSP00000262209	4
DHCR7-DT	KIF11	PSMB2		CA14	9606.ENSP00000358107	3
CST12P	SLC1A3	TNIK		CA5A	9606.ENSP00000498065	3
OR10A4	TTR	HSP90AB1		CES2	9606.ENSP00000499140	3
MRGPRD	CDC25B	MDM4		DUSP16	9606.ENSP00000298573	3
TRBC1	PSMB2	CBX4		F7	9606.ENSP00000364731	3
TPD52	TNIK	ZAP70		GLS	9606.ENSP00000317379	3
RSAD1	HSP90AB1	DRD1		GPR35	9606.ENSP00000411788	3
TRBV16	MDM4	ATG4B		GPR6	9606.ENSP00000406986	3
ISOC1	CBX4	NOX1		GPR84	9606.ENSP00000450310	3
EDRF1	ZAP70	KDM1A		KCNN1	9606.ENSP00000476519	3
CXADRP1	DRD1	PDGFRB		KCNN2	9606.ENSP00000264773	3
COX7C	ATG4B	GABRA1		KDM4C	9606.ENSP00000370710	3
MRFAP1L2	NOX1	AXL		P2RX7	9606.ENSP00000330696	3
SPAG11B	KDM1A	PRSS1		RPS6KA5	9606.ENSP00000479667	3
SPAG11A	PDGFRB	KLK7		TGM2	9606.ENSP00000355330	3
SRPK3	GABRA1	KEAP1		TYMP	9606.ENSP00000379038	3
CAPG	AXL	PDGFRA		AVPR1B	9606.ENSP00000356094	2
PRODH2	PRSS1	ADAM10		CA5B	9606.ENSP00000314099	2
HEATR5A	KLK7	MIF		ERAP1	9606.ENSP00000296754	2
TNFAIP8L1	KEAP1	AVPR1B		KLK1	9606.ENSP00000301420	2
MAS1L	PDGFRA	ACVRL1		L3MBTL1	9606.ENSP00000402107	2
MT1B	ADAM10	P2RX7		NAAA	9606.ENSP00000286733	2
MT1IP	MIF	TYRO3		P2RY6	9606.ENSP00000480966	2
ACSF2	AVPR1B	MAP2K2		PRKD2	9606.ENSP00000393978	2
RNF166	ACVRL1	NR4A1		PRSS1	9606.ENSP00000308720	2
TMEM64	P2RX7	STAT1		PTGER1	9606.ENSP00000292513	2
GPR42	TYRO3	SERPINE1		RORB	9606.ENSP00000366093	2
ARHGAP22	MAP2K2	SCD		SRD5A1	9606.ENSP00000274192	2
NANOS2	NR4A1	CYP3A4		ACACB	9606.ENSP00000341044	1
ACTBL2	STAT1	F7		ADAMTS5	9606.ENSP00000284987	1
ENSG00000264577	SERPINE1	GBA2		ATG4B	9606.ENSP00000384259	1
CCDC117	SCD	PLAU		F13A1	9606.ENSP00000264870	1
BORCS7	CLK2	KLK1		GBA2	9606.ENSP00000367343	1
TAF13	CYP3A4	FLT1		GGPS1	9606.ENSP00000282841	1
MBTD1	F7	ERAP1		GLRA1	9606.ENSP00000411593	1
CNN2	GBA2	ACACB		NQO2	9606.ENSP00000369822	1
MIXL1	PLAU	GPR84		PIM2	9606.ENSP00000365692	1
ENSG00000279072	KLK1	PTGER1		PIM3	9606.ENSP00000353824	1
ZNF236	FLT1	P2RY6		PRCP	9606.ENSP00000377055	1
LINC02532	ERAP1	HDAC9		SLC6A5	9606.ENSP00000434364	1
ISM1	ACACB	HSP90AA1		KLK7	9606.ENSP00000470538	0
TMEM168	GPR84	L3MBTL1		METAP2	9606.ENSP00000325312	0
MATCAP1	PTGER1			QTRT1	9606.ENSP00000250237	0
ENSG00000174171	P2RY6
METTL16	HDAC9
ARHGEF19	HSP90AA1
CPN2	L3MBTL1
LINC02550
GLIPR2
RNF19B
LINC02614
ADGRD2
TESC
ZNF692
RNF38
SNX30
MPRIP
GLOD4
CBLL2
H3P47
PRRX1
CHN2
UPRT
NPTN
ENSG00000261799
FOXJ2
MAGOH
MINDY4
SLC35F5
LINC00323
XRCC6P5
ARFIP2
CASP12
FAM241A
UBR3
MITD1
PDAP1
ZNF788P
TSPYL4
TXNDC12
ENSG00000260917
RIDA
ZDHHC11
ZNF600
LINC01215
LINC01896
ENSG00000280371
ENSG00000279284
SEMA3G
PABPC1L
MDM1
ARMT1
SMANTIS
ME1
NOP14
MXRA7
ZNF655
NIPSNAP3A
LRRC40
TMEM19
ZNF738
UPK3B
CDCA5
AAMP
WDSUB1
DENND6A
ZNF20
BAIAP2L2
ITPRID2
RABGGTB
DCTN3
ENSG00000223804
GREM2
IGKV2D-30
IGFBPL1
ZNF10
C5orf24
SMIM15
PIP4P2
FAM217B
PLAAT2
EEIG2
HTATSF1
SSC5D
HBM
TCEAL8
VRTN
ZNF468
MGC16275
GNG13
TNRC6C
ZNF765
AREL1
LINC01560
C1orf174
AMMECR1L
HMGN5
IGKV1-27
SETD6
ZNF768
ZNF776
LYSET
NAT16
ZNF559
SH3BGRL3
TMT1A
TLE2
MAP4K3
ACAA2
TMC4
GPR107
IKBIP
GHDC
ATOH8
CNPY2
ZNF503
EEF1AKMT2
NMNAT3
TAS2R5
PIWIL2
MYLK4
INTS13
LBH
THAP6
U2SURP
SGSM2
GGT6
PDXDC2P-NPIPB14P
PLEKHF2
HPCAL1
SREK1IP1
CYTIP
MROH7
SNX17
SDE2
MYOF
GOLGA8A
CDKN2AIP
RAB11FIP3
IQGAP2
GMPR
AVL9
KIFC3
AGO4
ARRDC4
SMIM5
ZNF140
RNF138
GPR27
CEP44
CPP
TRDV2
CYCSP24
TIGD7
RASA4
TPST1
NOA1
SNORA73A
EFR3A
NACC2
FOXJ3
ARK2N
SMIM32
CAAP1
BTNL8
ENSG00000269887
REEP3
MSANTD4
ZNF121
TMX3
S100PBP
HMGN3
GASK1B
TMEM123
CCL3L3
ENSG00000282408
ZNF639
ENSG00000262580
DPY19L3
GTF2A1L
CCDC43
PLSCR4
IFI30
ZNF75A
NKIRAS1
DAP
FAM174A
RBM3
C6orf120
KRT28
RTCA
ZMAT1
FUT6
VWCE
RNF141
IGKV5-2
UOX
SLC38A7
THRSP
IGLC2
MRFAP1L1
SCRN1
CRNKL1
SLC25A39
IKZF5
IGLC1
ZNF654
FAM91A1
RBM6
RNF146
ENSG00000271533
MUC20-OT1
OR52E4
AACS
ATP6V1G3
PRB1
OSR1
AGR3
OR10H2
IGLC5
IGLC4
IGLC6
IGLC3
LCORL
ATOSA
ZNF664
TC2N
ANXA7
INE1
GPR135
KRCC1
C2CD5
CCNT2
RAI2
ZBTB41
KLRF1
ZNF514
ENSG00000280306
CTDSPL
ARRDC3
SARAF
CYB561A3
CNPPD1
SELENOO
NKTR
PPIL4
ING2
CTF2P
FTHL17
SLC23A3
UBA3
OGFRL1
DMTF1
RTKN
DUS1L
ACAP2
POU5F1P3
IGHG3
POU5F1P4
WDR13
BLTP3B
LAMTOR1
PFDN6
ZNF12
SLC66A2
IGHV3-69-1
MUC20
CDK17
TIMM44
NIT1
PPP2R2D
SLC43A2
HTN1
DELEC1
TBRG4
ENSG00000259865
GPR78
SMC4
MED21
PEF1
ARHGEF18
CAVIN2
TMEM170B
SEL1L3
H3P37
GPR160
RGS18
STARD10
ABHD3
C1orf43
TESMIN
GMCL2
ASCL4
IGKV3-7
C1orf146
C16orf89
EID1
PAQR6
TSC22D2
SPOPL
ABHD14B
PABIR2
MRNIP
APOL6
CSRP1-AS1
FBXW4
ADCK5
ENSG00000277563
TMUB2
PTRH1
H1-10
TOR4A
MRPL54
GSTA3
DHX38
KLHDC3
ENSG00000280152
CALCOCO1
CRIP1
BTN3A3
IGHV2-70
IGHV2-26
IGHV3-30
IGHV1-45
NUDT16
FAM168B
CDK3
PPEF2
CHDH
SNORD87
THOC1
SLC22A9
IGHV4-61
RNF169
IGHV4-28
IGHV3-21
IGHV4-39
MAPRE1P2
MIR770
ENSG00000278363
IGHV4-59
ENSG00000274873
RNU105B
IGHV3-15
ENSG00000277996
CCDC182
FNDC1
SMG7
MRPL49
IGHV3-49
IGHV3-33
DEPP1
IGHV6-1
IGHV3-66
IGHV5-51
DDX27
GADL1
HIGD1C
IGHV2-5
LINC02598
H2AB1
CBR4
IGHV3-20
IGHV3-73
IGHV4-4
IGHV1-58
IGHV3-38
ANKRD12
IGHV1-24
CAMK2N1
GIMAP6
MORN4
IGHV3-74
IGHV3-43
ORAI2
ENSG00000277667
IGHV3-11
LY6D
PNISR
SCRT2
AGFG2
VSIG10L
HYI
CDC34
GPR156
TMEM120A
MFSD4B
RASSF4
NUDCD3
TM4SF1
R3HCC1
DUSP9
CLEC18B
TSPAN6
RBM23
ATP8B5P
REEP6
SFR1
MYO15B
ACTR1B
SBSPON
TMEM50A
ARHGAP33
GOLT1B
MANBAL
RELL1
LDLRAD4
PI16
APOLD1
ZNF710
UBR5-DT
PHYHD1
OR2W3
ZNF8
TP53I13
TSPYL5
IDH3G
PAOX
ASB16
CDHR2
METRN
ANKRD54
FXYD6
TSPAN33
MYL5
PRAC1
NRBP1
MYOZ3-AS1
HOOK2
ZER1
TCAF1
LINC02754
ARHGAP19
NUDT8
PLCXD1
IGKV2-29
SLC25A31
PEAR1
GALNT18
MRPL11
TMBIM1
CCDC102B
QTRT1
ANKRD52
GPBP1
CMTM4
RSC1A1
TWF2
CCSER2
ATP5IF1
TPRG1L
OAF
AKAP8L
H3P30
IGKV1D-22
SEC61G
SH3GLB2
SNX22
RHBDL1
UNC50
PANX3
SMIM24
SUSD2
MTARC2
RHEBP1
PLEKHA4
COMMD7
PARP10
LRRC75B
AMOTL2
TUBB8B
OCEL1
ETNPPL
TCEA1
LINC03129
LRRC55
MSC
HPR
CRISP1
EBF2
H3P33
CES5A
RTL8C
KIAA0232
CLEC14A
TMEM134
SYNGR4
ISOC2
BCAR3
PHYHIP
RETREG3
TMEM9B
RGL3
ACOT4
ILVBL
SFXN2
HS1BP3
ELMO3
TMEM256
FBXO9
GALM
LINC01315
DNPH1
MARVELD3
KLHL13
PCYT1B
SLC2A11
FAM220A
FSTL5
PAPOLA
FAM78B
R3HDML
GRAP
LRRFIP1
PPIL6
HOXA6
EEF1B2P2
ENSG00000254051
FKBP9
CUTC
TICAM2
ACVR1C
HSFX1
PALD1
ZNF135
FITM1
UNC93A
PLSCR3
MIDN
ARL6IP4
PGAP4
NIBAN1
IER5
C5orf58
MRPS2
CALHM3
TCEAL9
PRSS36
ENSG00000253574
DCUN1D4
NKD2
MAB21L4
MFSD3
WBP1L
LCE1C
IRX2
CRYGC
ENSG00000290929
SHCBP1
LYPLA2P1
DHRS1
C11orf96
KIAA1191
TPBG
ENSG00000280169
SLFN5
OR5L2
MCRIP2
TMEM191B
LMO7DN
KIAA2012
PLEKHH3
SLC10A6
ZBTB22
LINC00354
GATC
SKAP1-AS2
LINC00393
FBXL17
EML5
KRT27
SLC25A45
CHCHD1
TMED8
SLC23A4P
INIP
PARD6B
HOXC11
RBP5
ADAT1
YPEL4
DACT3
ANOS2P
EPHX3
RABEPK
ZNF253
CNPY1
FHL3
RAB40A
CD302
LINC01800
DUSP8
COMETT
TRARG1
MB21D2
MRPS14
SLX1A-SULT1A3
METTL8
SYCE1L
UTP20
DYNLRB1
MUC13
PAQR5
NOC2L
SCHIP1
RASSF9
RHOV
RASL11B
SUSD6
FOXO6
HIVEP3
ADCK1
RHOJ
CRIPTOP5
ARMH1
H3P28
GPR148
ESRP1
VWA5B1
MRPL50
PPIH
FBXO40
ST6GALNAC4
ANKRD9
KRTAP5-8
LCE1D
PSD3
TTTY14
OR2H2
UMOD
COL4A3
NPHS2
PKD1
WT1
APOA1
COL4A4
COL4A5
PKD2
ACTN4
CFH
COL4A1
FN1
CUBN
CFHR5
CFHR1
TFCP2L1
MKS1
WNT9B
SLC13A5
ARHGDIA
ANLN
EHHADH
GANAB
ZNF423
SOX17
FREM1
TBX18
NHERF1
ETFB
PASK
AXDND1
DSTYK
LRRC37A2
APOA1-AS
MFF-DT
LOC126806496
LOC129992813
LOC107982234
ATIC
LOC126806498
ACE
SLC12A3
VDR
AGTR1
EPOR
CASR
EGLN1
NR3C2
TCF7L2
EGLN2
EGLN3
SLC22A2
P4HTM
FTO
GHR
SLC5A2
APOL1
WDR72
PRKAG2
PDILT
KCNJ11
IGF2BP2
NFATC1
INS
HBB
TPPP
LPP
BICC1
FAN1
IRS1
CDKN2B
FGF5
SDCCAG8
SLC30A8
HMGA2
SCARB1
JAZF1
ZEB2
GATM
CCND2
ZMIZ1
PDE4D
STAC
TMEM178B
P2RY12
PAK1
CDKAL1
MYH9
KCNQ1
FKBP1A
PTPN22
ANKRD55
NR3C1
SHROOM3
PDE5A
APOE
A4GALT
SERPINC1
THADA
PDE4A
HMGCR
ADRB1
OPRK1
PDE4B
PDE9A
PDE4C
PAM
ADORA2B
PDE3B
PDE1A
ADORA2A
PPARG
CST3
PDE3A
PTGS2
IMPDH2
IMPDH1
PDE6D
PDE6G
PDE1C
PDE6B
PDE7A
PDE2A
PDE8B
PDE6H
PDE8A
PDE6A
PDE7B
PDE6C
PDE10A
UNCX
PIK3CG
SLC5A1
TH
DNAJB11
WFS1
MT-ND1
MT-ND2
ABCC8
LRP2
COL6A5
CDC123
INHBC
NDUFS4
OC90
RNLS
DPP4
UQCRFS1
LRIG1
CPS1
CD80
CD86
TRIM54
DPEP1
SOS2
DYSF
NUDT12
HHEX
EDNRA
SLC2A9
C9
PROX1
PLA2G4A
SLC6A13
NDUFS3
NKX6-3
SNCAIP
GATA3
CLIP4
GPD2
SLC8A1
BPNT2
MT-ND3
PARN
NDUFAB1
NDUFS1
MT-ND6
ELN
NDUFA5
MT-ND5
MT-ND4L
MT-ND4
NDUFV1
NDUFS8
NDUFB3
PPIA
NDUFB6
NDUFA1
NDUFA6
NDUFA11
NDUFB7
NDUFB11
NDUFA12
NDUFAF1
NDUFB4
NDUFS2
NDUFA3
NDUFA2
NDUFB9
NDUFV3
NDUFA8
NDUFA7
NDUFC2
NDUFB10
NDUFS7
NDUFS6
NDUFA4
NDUFAF3
NDUFV2
NDUFA9
NDUFA13
NDUFA10
NDUFS5
NDUFB8
NDUFAF4
NDUFAF2
GULP1
TOX
MEIS2
CCND1
THAP12
DYNLRB2
GRAMD2B
DACH1
NFAT5
ADRB3
KCNMB2
ADAMTS9
RP1L1
MYO7A
BMS1
OR51V1
ADAMTS7
ADRA1A
ADRA1D
ADRA1B
OPRM1
ZNF385D
ADRB2
RREB1
USP38
WDR11
AUTS2
LRP1B
KRT6B
SFMBT1
AFF3
GLP1R
RBL2
GALNTL6
NFE2L2
TMEM132D
LARP4B
HMG20A
ABCA4
ASAP2
IKBKB
TCF7L1
ZBTB43
AQP4
MPPED2
USP24
CALCOCO2
AFG2B
IL2RA
UBE3C
TCF4
TRPS1
KEAP1
MMADHC
NCAM2
B3GAT1
SLC34A1
SLC13A3
GNPDA2
STC1
CACNA1S
PTGS1
CACNA1C
CACNA1F
CACNA1D
PLEKHA5
GRIP1
TMEM132E
NAT8
SOCS5
HRH1
PSMB5
HS6ST1
KYNU
NADSYN1
SSPN
AR
KCNH8
RPGRIP1L
VPS8
TFDP2
DNAH8
NRIP1
ALMS1
REV1
ADARB2
ASCC3
PPAT
RASGRP1
SMAD6
IDE
SACS
HCN4
CYSLTR1
PCDH10
APRT
PEAK1
APOL2
TPRG1
BCL11A
GBA3
NFIB
TPRA1
MACF1
GPATCH2L
CELF1
PRKAG1
ANXA9
NRXN3
SLC7A9
CLVS1
KAT2B
SLC37A1
SETD7
SOD2
GPSM1
API5
GPC5
RMND1
ATRAID
TBL1XR1
DCDC2C
VEGFA
RAB5A
MUC7
SCAF8
IVNS1ABP
XPO1
WNT11
MAP3K1
CRTC1
CDH19
IDI1
LRMDA
WDR37
UBE2Q2
GCKR
MFF
CERS2
BMP8A
CHD7
HOXD8
CDKN1C
RPS29
GRB14
TMEM60
PIP5K1B
SEC61A1
MAML3
TXNDC9
LONRF2
EIF5B
MYO19
PSD4
TENM2
ADGRL1
COL6A6
UVRAG
CCL4
GLB1L2
RBFOX1
CCDC158
AKTIP
ASXL1
OVOL1
CCDC71L
CAMK1D
SRSF6
SP8
MADD
DAB2
NYAP2
LETM1
TET2
SIPA1L3
ELAVL2
CNTN4
CNTN6
TBX2
NR1H3
GUF1
LINGO2
COBLL1
PHTF2
TNF
XDH
SLC4A10
CADPS2
JAK2
IL6
TGFB1
RHEB
LPAR3
FGF23
CEP170
KL
NPPB
ALB
CCR2
PTH
LCN2
ACP2
MAP3K5
GSTM1
ADIPOQ
GABPA
BCAS3
AP5B1
LEP
FABP1
EPO
SOST
CD4
PABPC4
NLRP3
HIRA
GOT1
SLC17A5
RBP4
TNFRSF11B
AVPR2
HAMP
NCR3LG1
FGF21
PON1
AGT
SLC12A1
NPHS1
BDNF
TNNT2
AHR
GDF15
REN
PTPRN2
ACE2
KCNMA1
ANGPT2
TUBB
GGT1
GGTLC3
IL1B
GCG
MMP2
IDO1
APOB
HMGB1
GSK3B
JAK1
AP3S2
GPT
FNDC5
CRP
WFDC2
CCL2
VAMP8
AOPEP
HIF1A
NOS3
APLN
NUDT5
SPP1
C3orf70
TUBB4B
PAH
TUBB2A
ZNF318
EHMT1
RARRES2
TNNI3
PTX3
MIF
TUBB2B
TUBB6
TUBB3
TUBB4A
TUBB1
PRNP
CALCA
YAP1
VPS51
TXNIP
RENBP
CCR5
CD8A
FGFR2
IL17A
AQP2
DKK1
MSTN
ICAM1
ALPP
CAT
GUCY1A1
EGF
NQO1
NR1I2
MBL2
PVT1
UROD
KIT
VCAM1
FAM98B
GLB1L3
YIPF7
PPIF
SLC22A12
CD36
MS4A1
CDKN2A
AKT1
CMA1
MB
AGER
IL1R1
GH1
CX3CL1
SLPI
CDH1
ANGPTL4
IGHA1
CYP3A4
HLA-A
RETN
SLC9A3
TNFSF11
CHI3L1
NEFL
CDKN2B-AS1
SIRT1
SLC7A5
LCAT
CCL27
NAT10
ASRGL1
ATRNL1
PDLIM3
TGM2
CYP11B2
MPO
APOC3
LGALS3
KCNK3
F10
KCNN4
GAS5
CD2
AHSG
LPA
DMP1
HLA-DRB1
NFKB1
FBN1
MBL3P
ENG
SIRT6
SLC6A4
ATP6AP2
GGH
SOD1
ASAH1
BCL2
SLC22A6
EPAS1
ABCB5
SERPINE1
C5AR1
CD34
IL4
CDKN1A
CCN1
TCEAL1
C4A
SAA1
CASP3
BCR
MTOR
CXCL12
KANSL1
PCSK9
TNNT1
DKK3
HGF
IL33
RAC1
ABCA1
TIMP1
ILK
METRNL
F2R
ZDHHC11B
NR1H4
ARPIN
TFF3
TNFRSF1A
ACSL4
SIRPA
ENO4
EGFR
PPARA
LAPTM5
MMP10
PNPLA3
STING1
AMH
F11
SGK3
HAVCR2
PLA2G7
DNM1L
UTRN
DENR
CRMP1
DAPK2
CFB
SEMA3A
FGF19
NECTIN1
DDIT3
PPARD
C5
GPX4
MEG3
SEPSECS
TGFBR1
SAA2
NPPA
AZGP1
ABL1
VEGFB
MMP9
PROM1
AGK
MC2R
GUCY1B1
AOC3
VEGFC
TLR9
CXCR2
PIMREG
TRPC6
WNT1
PIN1
LYN
MAPK1
IL18
TREM2
IGFBP4
MYDGF
TNFRSF1B
FABP2
IL2
SRC
TNFSF13B
SIK1
PF4
ESR2
HAVCR1
FOXO1
ALDH2
NNMT
GPX1
MX1
HPSE
IL37
BDH1
PDGFRB
F8
RSBN1L
PTGER4
PPARGC1A
CP
CYP2C8
MYCT1
TRIB3
FYN
PEBP1
CYP3A5
NOD2
PNPLA2
YME1L1
ESRRA
CHIT1
TFF2
IGFBP2
EDN1
RPL17
TIMP2
TAGLN
GPR68
CEBPA
AVP
INSR
FGL2
MGP
ESM1
GGNBP2
ENTPD5
RTN3
REG1A
RUNX3
CORIN
SFRP5
HK2
LONP1
THBS2
FGFR1
ADORA3
ADORA1
FHL2
CD44
F5
CSF2
POSTN
CYP24A1
MARK2
SLC52A2
PWAR1
EDNRB
BMP2
HCK
PTGIR
ALOX15
APOL3
DRD1
IL1A
AHCY
RGMA
CD28
PRKCB
C1QTNF9
STH
MID1
NRG4
ANGPT1
TFF1
VEGFD
EZH2
HMMR
PRDX4
BLK
GIPR
FOXG1
CYP2D6
PDGFRA
EPHA2
PRKDC
LCK
CD52
BCL3
NOX4
SLC6A2
ADAMTS4
AEBP1
SQSTM1
FOLR2
IFNG
APOM
SERPINF1
CTHRC1
CHRNA4
PEBP4
SETMAR
RTL1
FOSL2
TWIST1
ABCG2
FGR
TP53RK
CHRNB2
AMPD1
YES1
TACR1
AMPD3
FRK
C3
CXCL13
PRDM16
CX3CR1
PRKAA2
PRKAA1
PRKAB1
YY1AP1
ALOX12
CNDP1
FOXP3
LIF
PLK2
STAT1
CXCL10
HLA-B
GCGR
MOK
EPB41L4B
NUP42
MAMLD1
IL20
SIRT2
OGT
CDK20
CDH18
KLF5
METTL3
CERS6
CD14
BLOC1S1
IGF2BP3
EGR1
MALAT1
PRKCA
BSG
AQP1
TERT
G6PD
ZBTB26
TJP1
CD19
MMP1
IGF1
WWP2
MGST2
TIMP3
SMPDL3B
HPGDS
SOAT1
MLKL
GVQW3
CDX2
SIRT5
CD5
CTSS
MANBA
GSTT1
B2M
LRG1
PTGDS
SERPINA12
HDAC1
DDIT4
RGS14
CXCR4
PRL
GREM1
CPT2
AKT3
CGA
STAT3
PHOSPHO1
BTG2
NCOA3
IL10RA
IGFBP5
FGFR4
TLR4
CGAS
TSC1
PRDX2
KHDRBS1
DCTN4
NUP62
GTF2H1
KLHL29
HDAC9
MYO9A
PTPRB
LGALS1
CASP1
GRP
FTH1
ENHO
MMP7
CDH2
MACIR
BMP1
HDAC3
NOS2
IL22
PACS2
ADIPOR1
ITPR2
ARAP1
SGCB
DHRS11
IGHG1
INSIG1
THY1
PIK3CA
APOL4
NBR1
SMAD3
CD79A
GJB2
SKI
BMP7
RBM45
SHBG
NOS1
PIK3CD
PIK3CB
CD38
PINK1
ZNHIT3
FCGR3A
CASP4
FCGR3B
NOTCH1
MTHFR
PART1
RIPK3
GGCX
TXN
USP36
NEDD4L
MLXIPL
DYRK2
NDRG1
ELMO1
GSTO2
CKAP4
GAST
NPIPA2
SERPINA3
GHRL
RNASEH2C
PSMG2
KLHDC4
ORAI1
NT5E
TRPM5
OLR1
TNC
APOC2
ALPK1
GLI1
PABIR1
S100A12
MBP
IGFBP7
FRMD3
USP47
FOXK1
OTUB2
AIF1
KLF4
DHRS9
GPC4
ODC1
EPHB2
NOD1
BAX
SELE
FGF2
AKR1A1
CD59
CDK4
CD207
CA2
WNT5A
SLC6A6
BMP6
SIRT3
GSDMB
MYH14
MMP3
SLC2A10
GRN
SLCO1A2
PLAUR
CHD3
HSD3B2
CD48
TTC17
SERPINA1
GJA1
FSTL1
ITLN1
LGALS9
APOC1
CTNS
SH2B3
NEAT1
ATG4B
AKR1B1
HP
SSTR2
CORT
TFEB
PLA2R1
ATP12A
TSPYL2
FOXO3
UNC13B
CXCR3
GSTO1
ENTPD1
ADA
SLC34A2
TF
NOX5
NR4A1
MDK
ATP4A
STAT5A
STAT5B
RBBP6
FAP
HLA-DQA2
MINDY1
PENK
PBK
HLA-DQA1
PLN
MT-CO2
ROCK1
FABP4
PLAU
MAPT
NSA2
KIDINS220
ATAD2
TET1
SFN
UCP2
TNFSF10
EPHX2
L2HGDH
THBS1
SPDL1
MAPK3
FASLG
KCNA3
FOS
AQP11
MEIS1
ALOX5
SDC1
IL20RA
TP53
PHLDA1
MFN2
INF2
ELAVL1
CPT1A
SOX6
GPX3
SELL
PRRT2
PRKCG
CAPN6
ROCK2
APOA4
CYP27B1
PLK1
SIRT7
HIPK2
CNP
ERN1
VTN
HTR2A
CRISP2
SPZ1
SOD3
COPA
SCD
CCN2
PRMT3
CDK5
CXCL8
NCF2
SCN2A
MAF
CXCL16
HSPA1A
NPY
FIP1L1
RRAGA
DRD2
CTLA4
PRKAR2B
PRAP1
TGFA
GABRB3
CNR1
LCLAT1
HLA-DPA1
PTPA
STK25
TPO
CDAN1
BRCC3
GDPD4
HSPA5
F2RL1
RUNX2
ACTB
ARHGEF28
RIPK2
GABRB1
GABRB2
GABRA4
HTR2C
GABRA5
GABRD
GABRA1
GABRA3
GABRA2
GABRQ
GABRG1
GABRE
GABRA6
GABRP
GABRG3
GABRG2
PLG
FABP3
IGF2
CDKN1B
FBLN1
CD74
GSDME
PLOD1
ATXN2
ADAM10
VWF
DIS3L2
C1QTNF3
TGFBR2
SP1
PGF
CXCL6
AFM
TNFRSF21
CCR7
THBD
RAB2A
APOA5
ACAD8
ACSM5
PKM
TRPA1
BRAP
BIRC5
PER2
IMPA1
MAS1
COL18A1
SLC20A1
SSR1
ESYT2
AMBP
XIST
REST
VIM
HLA-G
KDM6B
PGP
LRPPRC
ATF4
PRKN
VPS37A
CAD
SULT2A1
BRD2
IGF1R
TFPI
NT5C1A
POU1F1
CAST
IRF4
PTPRC
FIS1
GALR2
[truncated: 17,587 more rows]

## Sheet: Figure_3
	Figure 3_A					Figure 3_B					Figure 3_C					Figure 3_D
	Biological function analysis					Molecular function analysis					Cellular component analysis					KEGG analysis
	Term	Gene ratio	P-Value	Count		Term	Gene count	P-Value	Count		Term	Gene ratio	P-Value	Count		Term	Gene ratio	P-Value	Count
	MAPK cascade	0.0874317	8.7e-10	16		Protein binding	0.830601	0.00014	152		Cytosol	0.513661	1.1e-11	94		MAPK signaling	0.114754	9e-07	21
	Inflammatory response	0.0819672	5.8e-05	15		Protein kinase activity	0.169399	4e-22	31		Plasma membrane	0.480874	1.2e-09	88		PI3K-Akt signaling	0.10929	5.3e-05	20
	Hypoxia response	0.0437158	0.0014	8		Rho-Kinase activity	0.0928962	4.8e-06	17		Nucleus	0.448087	2.4e-05	82		Adherens junction	0.0710383	0.032	13
	Mechanical stimulus response	0.0437158	9.9e-06	8		AMPK activity	0.0710383	5.4e-06	13		Extracellular exosome	0.371585	8.6e-06	68		Focal adhesion	0.0655738	0.0016	12
	Apoptotic regulation	0.0382514	0.088	7		Oxidoreductase activity	0.0710383	1.2e-05	13		Mitochondrion	0.224044	0.00048	41		NODLR signaling	0.0655738	0.00092	12
	NF-kB activation	0.0327869	0.0054	6		FGF receptor activity	0.0655738	5e-11	12		Extracellular region	0.163934	0.03	30		HIF-1 signaling	0.0601093	4.2e-05	11
	Cytokine signaling	0.0327869	0.011	6		Scaffold protein binding	0.0601093	3.1e-07	11		Membrane organelle	0.163934	0.0038	30		TLR signaling	0.0601093	3.9e-05	11
	TNF signaling	0.0327869	0.004	6		Cadherin binding	0.0491803	0.082	9		Protein-containing complex	0.153005	0.0011	28		Apoptosis	0.0546448	0.0011	10
	ROS regulation	0.0327869	1.7e-05	6		Protein phosphatase binding	0.0382514	0.0015	7		Golgi apparatus	0.114754	0.068	21		Necroptosis	0.0546448	0.0032	10
	ECM organization	0.0273224	0.068	5		Integrin binding	0.0327869	0.018	6		Focal adhesion	0.103825	0.00045	19		Autophagy	0.0546448	0.0048	10
	TGF-beta signaling	0.0218579	0.071	4		HDAC binding	0.0327869	0.0074	6		Centrosome	0.0874317	0.035	16		FoxO signaling	0.0546448	0.00094	10
	Cellular stress response	0.0218579	0.0033	4		Heme binding	0.0327869	0.061	6		Collagen-containing ECM	0.0874317	0.0072	16		NF-kB signaling	0.0491803	0.00083	9
	Fibroblast proliferation	0.0218579	0.013	4		JUN kinase activity	0.0273224	0.00028	5		Nuclear speck	0.0710383	0.044	13		TNF signaling	0.0491803	0.0019	9
	PI3K-Akt signaling	0.0218579	0.032	4		Electron transfer activity	0.0218579	0.019	4		Secretory granule lumen	0.0655738	8.2e-05	12		IL-17 signaling	0.0491803	0.00043	9
	EMT regulation	0.0163934	0.091	3		MAPK activity	0.0218579	0.0086	4		Lysosomal lumen	0.0546448	0.011	10		ErbB signaling	0.0491803	0.00021	9
	NLRP3 inflammasome	0.0163934	0.026	3		Laminin binding	0.0163934	0.021	3		Spindle microtubule	0.0546448	0.0048	10		Relaxin signaling	0.0491803	0.0032	9
	Angiotensin response	0.0163934	0.011	3		FAD binding	0.0163934	0.057	3		Nucleoplasm	0.0491803	5.9e-08	9		JAK-STAT signaling	0.0437158	0.041	8
	Cell adhesion regulation	0.0163934	0.099	3		NADP binding	0.0163934	0.062	3		Extracellular space	0.0437158	0.0065	8		Reactive oxygen species	0.0382514	1.3e-06	7
	p53 DNA damage response	0.0163934	0.044	3		Ca²⁺-activated K⁺ channel activity	0.0163934	0.099	3		Cell surface	0.0273224	1.5e-06	5		Mitophagy	0.0327869	0.049	6
	Mitochondrial depolarization	0.010929	0.081	2		Enzyme binding	0.010929	5.8e-07	2		Membrane raft	0.0218579	0.0001	4		RAS system	0.0163934	0.07	3

## Sheet: Figure_4
Figure_4
Targets	PDB ID	Method	Resolution	Organism(s)	ΔG, kcal·mol−1			Average	SD	Amino acid residue	Interaction
					Run 1	Run 2	Run 3
EGFR	3POZ	X-RAY DIFFRACTION	1.50 Å	Homo sapiens	-6.2	-6.1	-6.1	-6.13333	0.057735	MET A:793, LEU A:844, ALA A:743, VAL A:726, THR A:854	Conventional hydrogen bond, Pi-sigma, Alkyl, Pi-alkyl
ERBB2	3PP0	X-RAY DIFFRACTION	2.25 Å	Homo sapiens	-6.5	-6.5	-6.6	-6.53333	0.057735	MET A:801, LEU A:800, LEY A:726, LEU A:852, GLY A:804, ALA A:751, GLY A:729, GLY A:727, SER A:728, VAL A:734, LYS A:753, ASP A:863, THR A:862, THR A:798	van der Waals, Conventional hydrogen bond, Carbon hydrogen bond, Pi-sigma, Alkyl, Pi-alkly
PARP1	7KK3	X-RAY DIFFRACTION	2.06 Å	Homo sapiens	-7.2	-6.9	-7.2	-7.1	0.173205	LYS C: 903, TYR C:896, TYR C:907, ALA C:898, SER C:904	Conventional hydrogen bond, Pi-pi stacked, Pi-alkly
NFKB1	1SVC	X-RAY DIFFRACTION	2.60 Å	Homo sapiens	-5.6	-5.5	-5.6	-5.56667	0.057735	PHE P: 220, ALA P:181, ARG P:164, ILE P:163	Carbon hydrogen bond, Pi-Pi T-shaped, Alkyl, Pi-Alkyl
HIF1A	3HQU	X-RAY DIFFRACTION	2.50 Å	Homo sapiens	-5.4	-5.5	-5.7	-5.53333	0.152753	VAL A:264, THR A:263, LEU A:32, PRO A:41, GLU A:262, THR A:39	Conventional hydrogen bond, Carbon hydrogen bond, Pi-Anion, Pi-Sigma, Alkyl
NFE2L2	3ZGC	X-RAY DIFFRACTION	2.20 Å	Homo sapiens	-6.9	-7.16	-7.1	-7.05333	0.136137	ALA A:556, VAL A:606, VAL A:465, GLY A:464, ARG A:415	Conventional hydrogen bond, Carbon hyderogen bond, Alkyl, Pi-alkyl
STAT1	1BF5	X-RAY DIFFRACTION	2.90 Å	Homo sapiens	-5.3	-5.5	-5.3	-5.36667	0.11547	GLN A:243, ARG A:321, CYS A:247, PRO A:329, GLY A:249, GLN A:330, PRO A:332, PRO A:252, ALA A:246, ASN A:253	van der Waals, Conventional hydrogen bond, Carbon hydrogen bond, Pi-sigma, Alkyl, Pi-alkly
IGF1R	5HZN	X-RAY DIFFRACTION	2.20 Å	Homo sapiens	-6.9	-6.8	-6.9	-6.86667	0.057735	MET G: 1079, ALA G:1028, VAL G:1010, MET G:1139, MET G:1076, MET G:1051, VAL G:1060, ASP G:1150, GLY G:1149	Conventional hydrogen bond, Carbon hydrogen bond, Pi-Sigma, Pi-Sulfur, Alkyl, Pi-alkly
MAPK14	3HP5	X-RAY DIFFRACTION	2.30 Å	Homo sapiens	-7.5	-7.2	-7.3	-7.33333	0.152753	ASP A:292, SER A:293, LEU A:195, LEU A:232, LEU A:246, LEU A:291, PRO A:191, ILE A:250, TRP A:197	Conventional hydrogen bond, Carbon hydrogen bond, Pi-pi stacked, Alkyl, Pi-alkly

## Sheet: Figure_5
	Figure_5_A						Figure_5_B						Figure_5_C						Figure_5_D
	Urine volume (ml)						Relative left kidney weight (mg/g)						Relative right kidney weight (mg/g)						Total protein in urine (mg/ml)
	Sham	NC + C-20	UUO	UUO + C-10	UUO + C-20		Sham	NC + C-20	UUO	UUO + C-10	UUO + C-20		Sham	NC + C-20	UUO	UUO + C-10	UUO + C-20		Sham	NC + C-20	UUO	UUO + C-10	UUO + C-20
	12	14	3	13	14		3	3.7	27.4	12.9	17		3	3.8	5	4.4	4.6		0.34	0.47	3.5	0.86	0.7
	16	15	5	14.5	11.5		3.1	3.5	31	7.2	18.5		3.3	3.7	5.4	4.1	4.4		0.29	0.45	3.9	1.01	0.59
	16	13	6	12	14		3.6	3.4	33.3	19.1	8.4		3.6	3.5	5.5	4.3	3.7		0.31	0.43	2.1	0.76	1.05
	12	13	3.5	12.5	14		3	3.4	42.7	14.3	20.7		3.6	3.5	4.9	5	4.7		0.51	0.27	2.9	0.7	0.71
	14	15	3.5	13.5	15		3.6	3.9	28.7	13.6	11.1		3.9	4.1	6	4.4	4.7		0.19	0.36	2.9	0.69	1.13
	15	15	6	12	11.5		3.2	3.3	35.4	24.2	12.7		3.2	3.3	5	5.3	4.9		0.22	0.49	3.1	0.88	0.94
	Figure_5_E						Figure_5_F						Figure_5_G						Figure_5_H
	Plasma creatinine (µmol/L)						BUN level (mmol/L)						Urine creatinine (µmol/L)						eGFR (ml/min)
	Sham	NC + C-20	UUO	UUO + C-10	UUO + C-20		Sham	NC + C-20	UUO	UUO + C-10	UUO + C-20		Sham	NC + C-20	UUO	UUO + C-10	UUO + C-20		Sham	NC + C-20	UUO	UUO + C-10	UUO + C-20
	52.6	35.36	97.2	52.6	62		5.7143	5	15.7	8.24259	8.24217		6683	6223	1874	3607	3713		1.05	1.71	0.04	0.61	0.58
	53.4	35.2	88.4	62.2	61.8		6.0714	5.71429	20.4	8.57143	8.21429		7107	6718	2157	3890	3960		1.49	1.32	0.08	0.63	0.51
	52.9	52.7	106	53.04	62.1		6.4286	5.35714	19.6	11.0714	5.71429		6895	6506	1697	3465	3571		1.44	1.11	0.07	0.54	0.56
	53.2	30.94	133	79.56	79.7		5.7143	5.53571	18.2	7.14286	7.85714		7426	7213	2298	4013	4219		1.17	1.23	0.04	0.44	0.52
	35.4	52.9	124	61.88	79.56		6.7857	6.42857	23.9	10	9.64286		7178	7390	1980	3984	3948		1.97	2.18	0.04	0.6	0.52
	39.8	53.4	97.2	79.56	61.88		4.2857	6.07143	16.8	9.64286	8.57143		7001	6506	2122	3942	3954		1.83	2.19	0.09	0.41	0.51
																								Figure 5H. Oral administration of citropten (10 & 20 mg/kg/day for 21 days) significantly preserved eGFR compared with that of rats with unilateral ureter obstruction. Data are presented as scatter dot plots with individual values overlaid on mean ± standard deviation (SD) bars (n = 6 rat samples per group). Statistical analysis was performed using one-way analysis of variance (ANOVA) followed by…

## Sheet: Figure_6
Figure_6_A						Figure_6_B						Figure_6_C
Tubular necrosis score (0-3)						Glomerular sclerosis (0-3)						Tubulointerstitial fibrosis score (0-3)
Sham	NC + C-20	UUO	UUO + C-10	UUO + C-20		Sham	NC + C-20	UUO	UUO + C-10	UUO + C-20		Sham	NC + C-20	UUO	UUO + C-10	UUO + C-20
0.3	0.31	2.2	1.7	1.62		0.2	0.18	2.1	1.4	1.39		0.4	0.39	2.5	1.5	1.24
0.2	0.22	2.45	1.68	1.67		0.21	0.14	2.4	1.6	1.51		0.3	0.29	2.7	1.7	1.64
0.25	0.27	2.55	1.26	1.25		0.14	0.1	1.9	1.5	1.48		0.5	0.47	2.6	2	1.78
0.35	0.37	2.35	1.46	1.48		0.12	0.14	2.5	1.45	1.49		0.3	0.45	2.9	1.9	1.89
0.38	0.21	2.5	1.28	1.3		0.13	0.16	2.2	1.56	1.5		0.45	0.57	2.4	1.85	1.82
0.37	0.29	2.39	1.54	1.54		0.2	0.17	2.4	1.38	1.4		0.35	0.24	2.8	1.7	1.67

## Sheet: Figure_7
Figure_7_C				Figure_7_D				Figure_7_E				Figure_7_F
% E-Cadherin positive area				% α-SMA positive area				Fibronectin (ng/ml)				Collagen I (ng/ml)
Sham	UUO	UUO + C-10		Sham	UUO	UUO + C-10		Sham	UUO	UUO + C-10		Sham	UUO	UUO + C-10
90.2	28.4	52.7		2.3	24.5	10.5		2.8	7.5	5.3		22.2	75.2	35.2
92.1	30.1	58.3		2.7	27.8	11.9		2.1	6.9	4.6		18.2	62.4	26.4
89.7	25.6	49.9		3.1	30.2	13.2		3.3	7.8	5.5		18.8	47.6	38.7
91.8	22.9	55.1		2.9	29.1	12.6		3.1	8.1	5.6		18.2	42.1	38.3
88.9	19.8	47.6		3	26.7	13.2		1.6	6.5	4.2		22.4	59.7	20.3
93.5	27.3	60.2		2.8	28.9	12.1		2.1	6.8	4.5		27.9	42.3	33.1

## Sheet: Figure_8
Figure_8_B				Figure_8_D				Figure_8_F
% p-NF-κB p65 positive area				% Nrf2 positive area				% PARP positive area
Sham	UUO	UUO + C-10		Sham	UUO	UUO + C-10		Sham	UUO	UUO + C-10
4.2	36.5	18.9		12.1	5.2	9.3		10.8	42.3	24.7
2.2	38.7	21.1		11.8	5.7	9.7		11.5	44.1	25.3
3.4	35.2	17.8		12.5	6.1	9.5		9.9	43.6	23.9
4.1	37.9	19.6		11.9	5.4	9.6		12.2	45.1	26.4
5.1	39.1	20.2		12.3	5.6	9.4		10.6	41.8	24.5
6.3	36.8	18.7		12	5.5	9.4		11.4	44.5	25.1
Figure_8_H				Figure_8_J				Figure_8_L
% Pink-I positive area				% Parkin positive area				% LC3B positive area
Sham	UUO	UUO + C-10		Sham	UUO	UUO + C-10		Sham	UUO	UUO + C-10
34.5	14.8	25.7		32.8	12.6	22.4		30.6	10.5	20.3
36.2	15.6	26.3		33.4	13.3	23.2		31.1	11.2	21.4
35.8	13.9	24.9		31.7	11.8	21.7		29.8	9.8	19.6
33.9	16.2	27.1		34.2	14.3	23.8		32.4	10.9	20.8
37.1	15.1	25.5		32.9	13.1	22.6		30.9	11.4	21.2
36.5	14.5	26.3		33.9	12.5	23.2		31.5	10.1	20.5
